# Supplementary material for: Successful Manipulation of the Gut Microbiome to Treat Spontaneous and Induced Murine Models of Colitis
Source: PubMed Central journal article supplement — Gastro Hep Adv. 2022 Mar 30;1(3):359–74. doi: 10.1016/j.gastha.2021.12.008 (PMC11307790; doi:10.1016/j.gastha.2021.12.008), 2022-03-30
Supplement: mmc1.pdf [file mmc1.pdf]

**Suppl Fig 1. Blinded subscore of proximal and distal colons in *Winnie* and WT mice following AB5 for 10 days**

**Proximal colon**

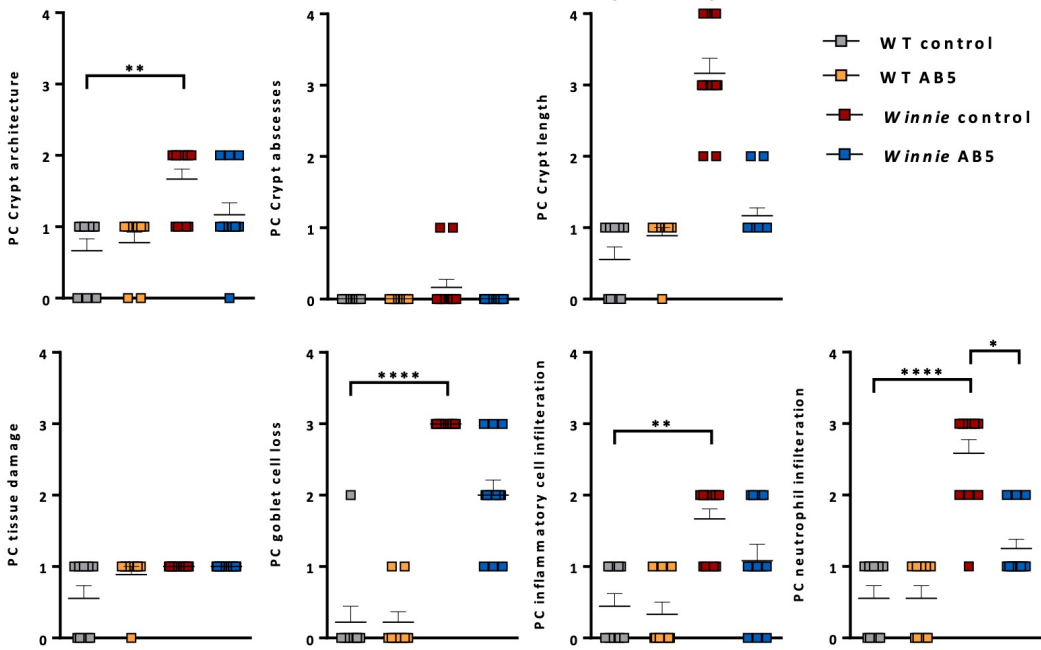

**Distal colon**

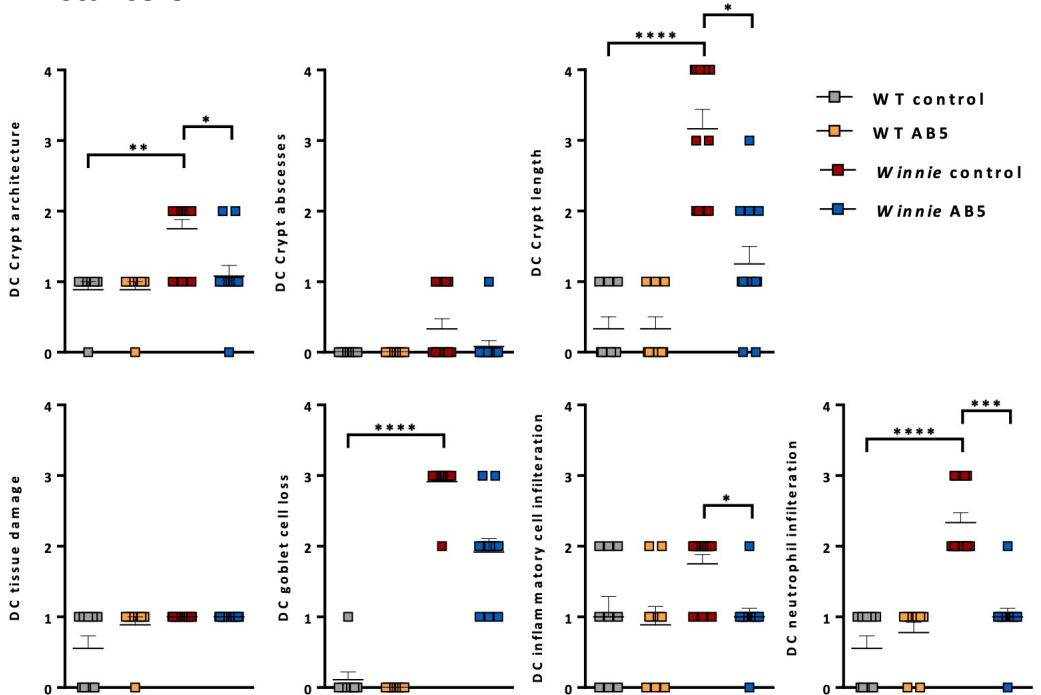

Suppl Fig 2. Treatment with AB5 was associated with a germ free-like phenotype

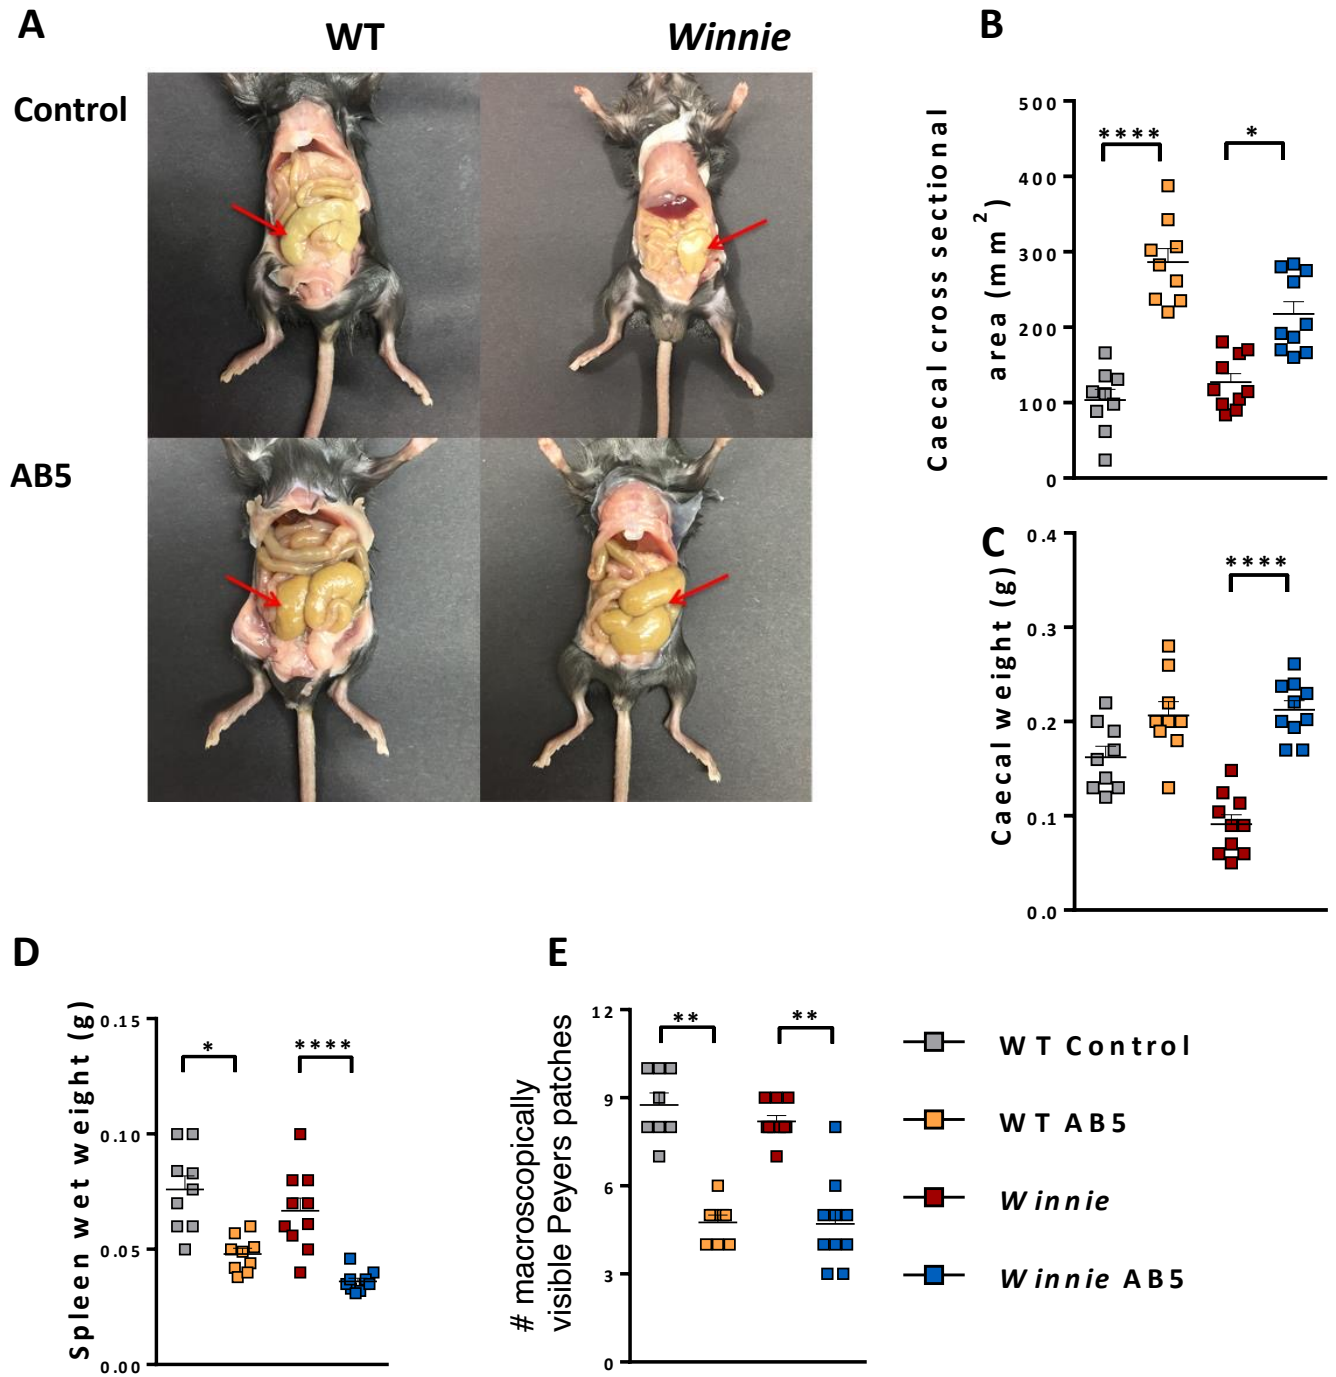

### Suppl Fig 3. Blinded subscores of proximal and distal colon histology in *Winnie* at 4 and 8 weeks following AB5 or dummy treatment

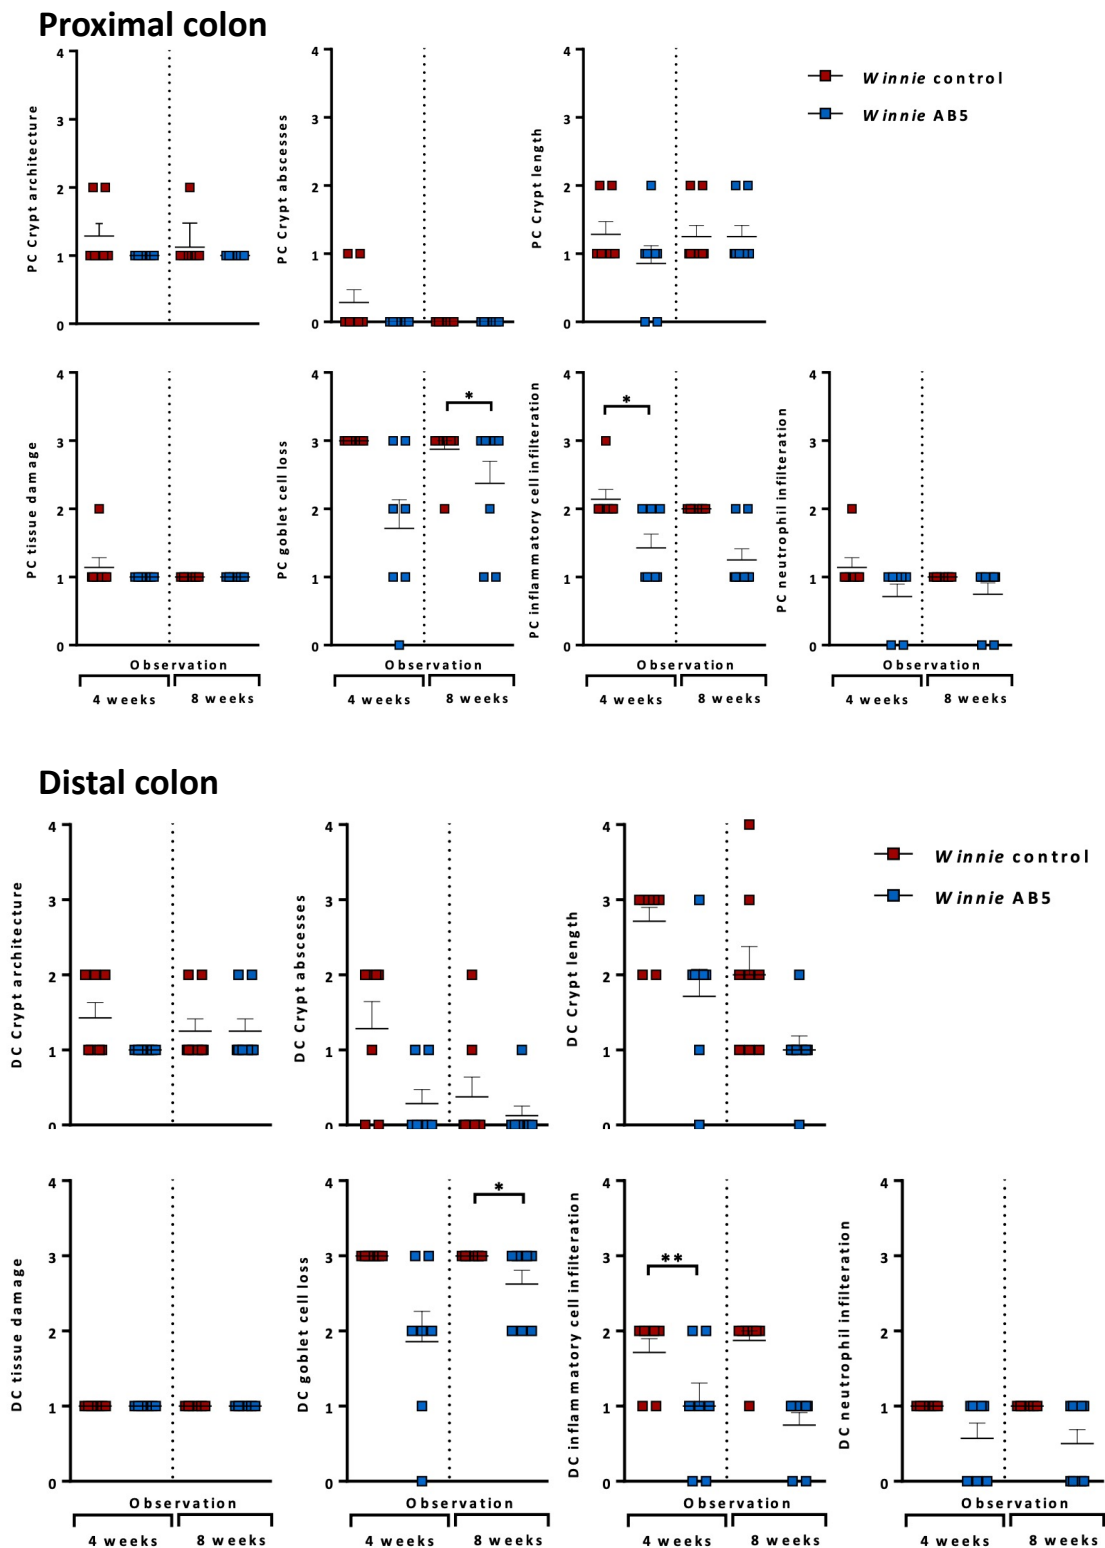

# Suppl Fig 4. Alpha diversity from 10 d in *Winnie* +/- AB5

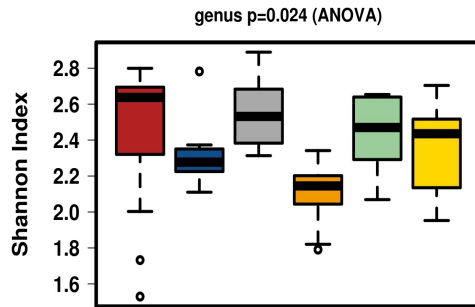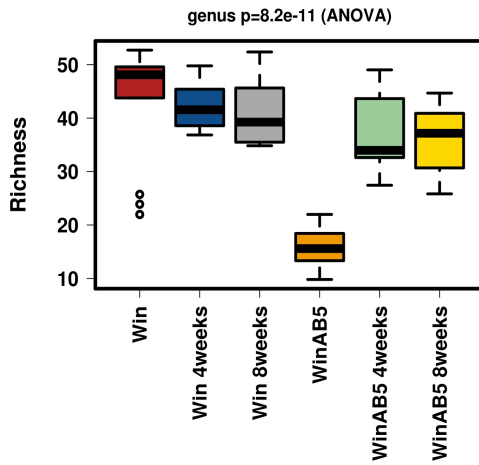

**Suppl Fig 5. Blinded subscores of proximal and distal colon histology following acute DSS colitis treated with caecal gavages.**

**Proximal colon**

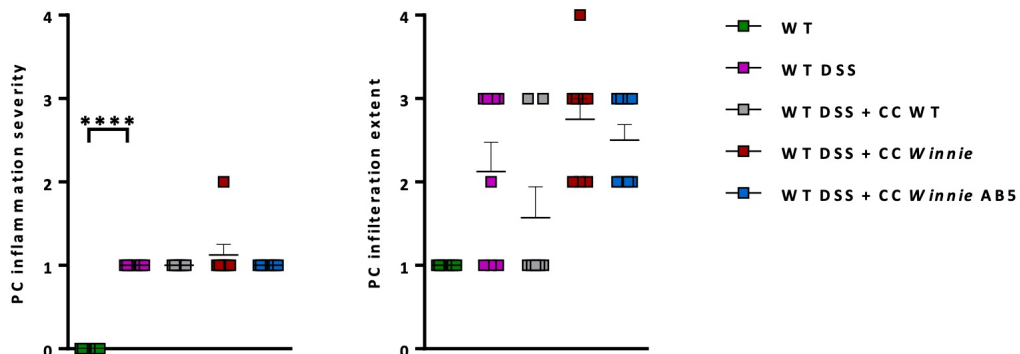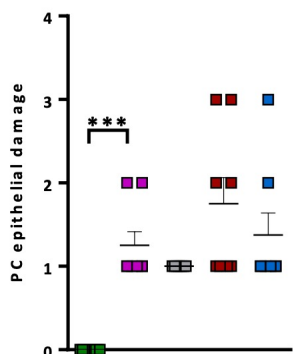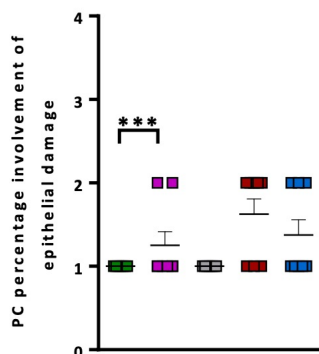

**Distal colon**

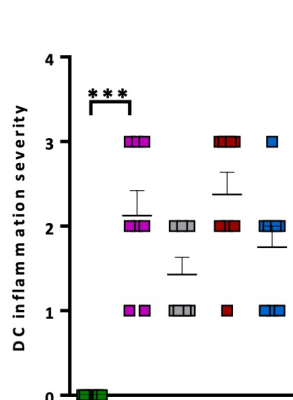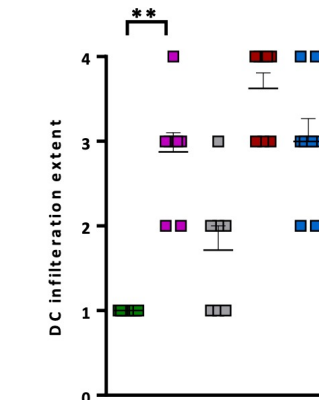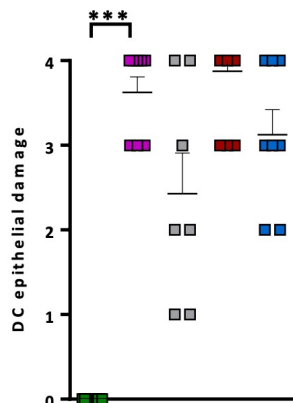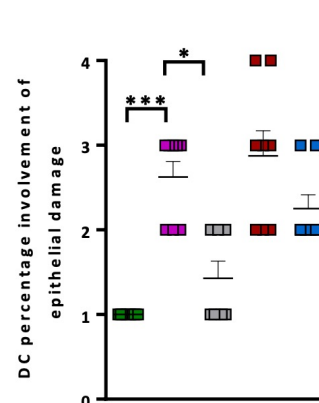

## Suppl fig 6

Bacterial oligonucleotide primer sequence and amplicon size for different targeted phyla

| <b>Targets (Bacteria)</b>      | <b>Forward and reverse primer sequences</b> | <b>Amplicon size (bps)</b> |
|--------------------------------|---------------------------------------------|----------------------------|
| Universal 16s                  | F: CGGCAACGAGCGCAACCC                       | 145                        |
|                                | R: CCATTGTAGCACGTGTGTAGCC                   |                            |
| <i>Akkermansia</i>             | F: CAGCACGTGAAGGTGGGGAC                     | 328                        |
|                                | R: CCTTGCGGTTGGCTTCAGAT                     |                            |
| <i>Clostridium</i> cluster IV  | F: TTACTGGGTGTAAAGGG                        | 587                        |
|                                | R: TAGAGTGCTCTTGCGTA                        |                            |
| <i>Clostridium</i> cluster XIV | F: AAATGACGGTACCTGACTAA                     | 439                        |
|                                | R: CTTTGAGTTTCATTCTTGCGAA                   |                            |
| <i>Prevotella</i>              | F: CACRGTAAACGATGGATGCC                     | 513                        |
|                                | R: GGTCGGGTTGCAGACC                         |                            |
| <i>Bacteroides</i>             | F: AAGGTCCCCACATTGG                         | 312                        |
|                                | R: GAGCCGCAAACCTTCACAA                      |                            |
| <i>Bifidobacterium</i>         | F: GGGTGGTAATGCCGGATG                       | 511                        |
|                                | R: CCACCGTTACACCGGGAA                       |                            |
| <i>E.coli</i>                  | F: GGAAGAAGCTTGCTTCTTTGCTGAC                | 544                        |
|                                | R: AGCCCGGGGATTTACATCTGACTTA                |                            |
